# Supplementary material for: Selective regulation of autophagy by the Iml1-Npr2-Npr3 complex in the absence of nitrogen starvation
Source: PubMed Central journal article supplement — Mol Biol Cell. 2011 Nov 1;22(21):4124–33. doi: 10.1091/mbc.E11-06-0525 (PMC3204073; doi:10.1091/mbc.e11-06-0525), 2011-11-01
Supplement: supp_E11-06-0525_Wu_supplementcombined.pdf [file supp_E11-06-0525_Wu_supplementcombined.pdf]

**Supplemental Information (Wu and Tu, “Selective Regulation of Autophagy by the Iml1p-Npr2p-Npr3p Complex in the Absence of Nitrogen Starvation”)**

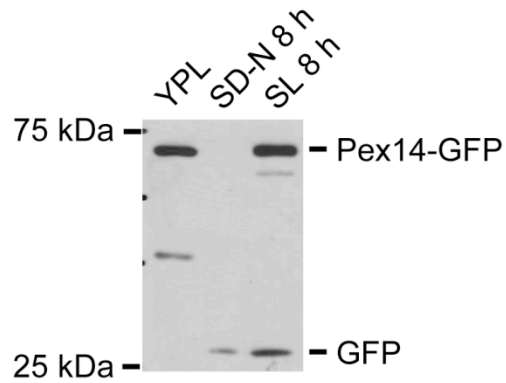

**Figure S1.** Pexophagy is Induced upon Switch to SL Medium.

Cells were grown in YPL to log phase before switch to either nitrogen starvation medium (SD-N) or non-starvation medium (SL). After 8 hours following medium switch, autophagic degradation of peroxisomes was assayed by Western blot using Pex14-GFP as the reporter. Pex14p is a peroxisomal membrane protein.

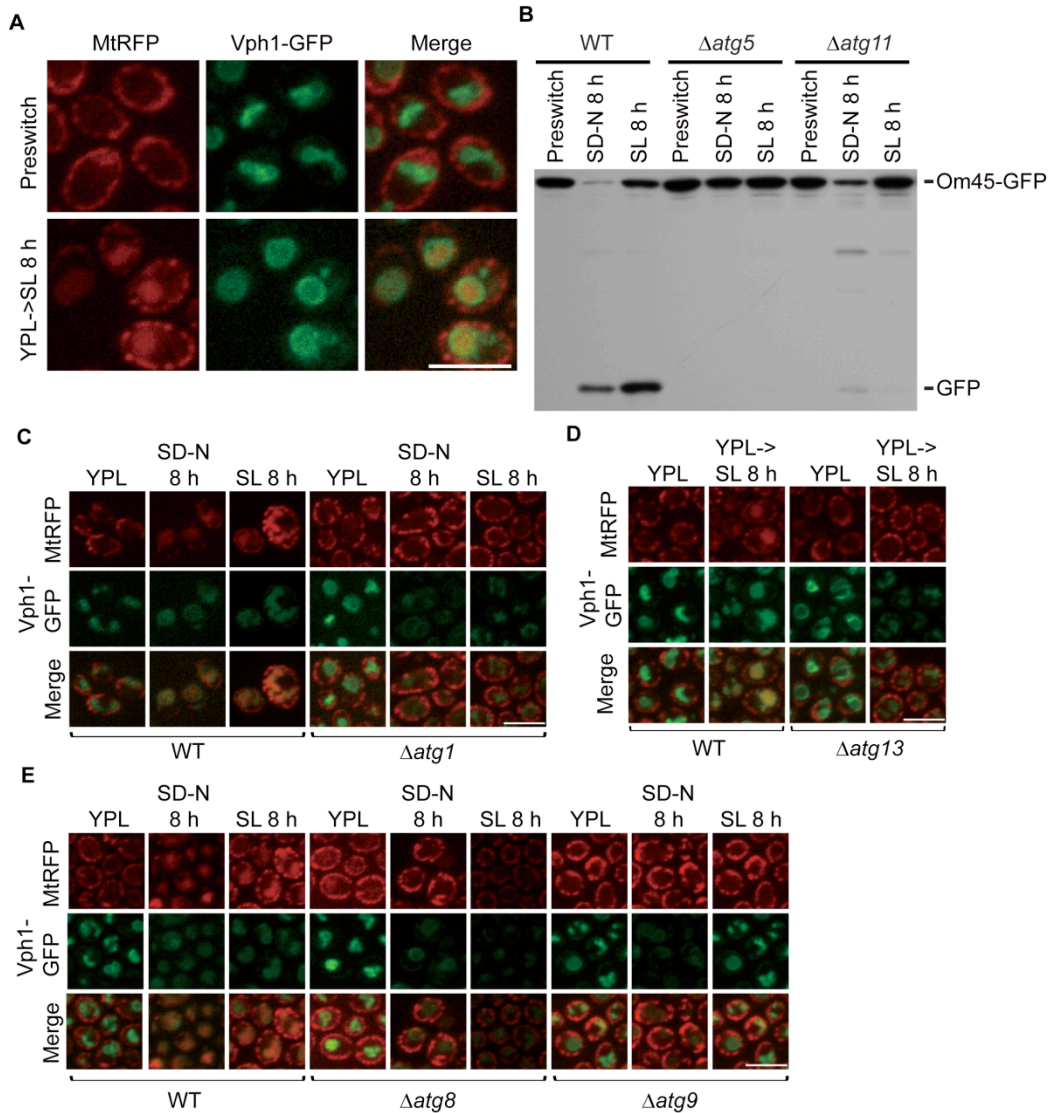

**Figure S2.** NNS-induced Mitophagy is Blocked upon Deletion of *ATG1*, *ATG5*, *ATG8*, *ATG9*, *ATG11* or *ATG13*.

Cells were cultured as described in Figure S1. After 8 hours following medium switch, mitophagy was assayed by imaging using MtrRFP as the reporter or by Western blot using Om45-GFP as the reporter. MtrRFP is a reporter targeted to the mitochondrial matrix. *OM45* encodes a mitochondrial outer-membrane protein. Vph1-GFP is a marker for the vacuole.

(A) Mitochondria reporter was detected in the vacuole after switch to SL medium for 8 h. Scale bar, 10  $\mu$ m.

(B) The release of free GFP from Om45-GFP increased upon switch to autophagy-inducing media (SD-N and SL) and was blocked in  $\Delta atg5$  and  $\Delta atg11$  cells.

(C-E) In contrast to WT cells, the vacuolar mitochondrial signal was undetectable in  $\Delta atg1$ ,  $\Delta atg13$ ,  $\Delta atg8$  and  $\Delta atg9$  cells following switch to the autophagy-inducing media (SD-N and SL). Scale bar, 10  $\mu$ m.

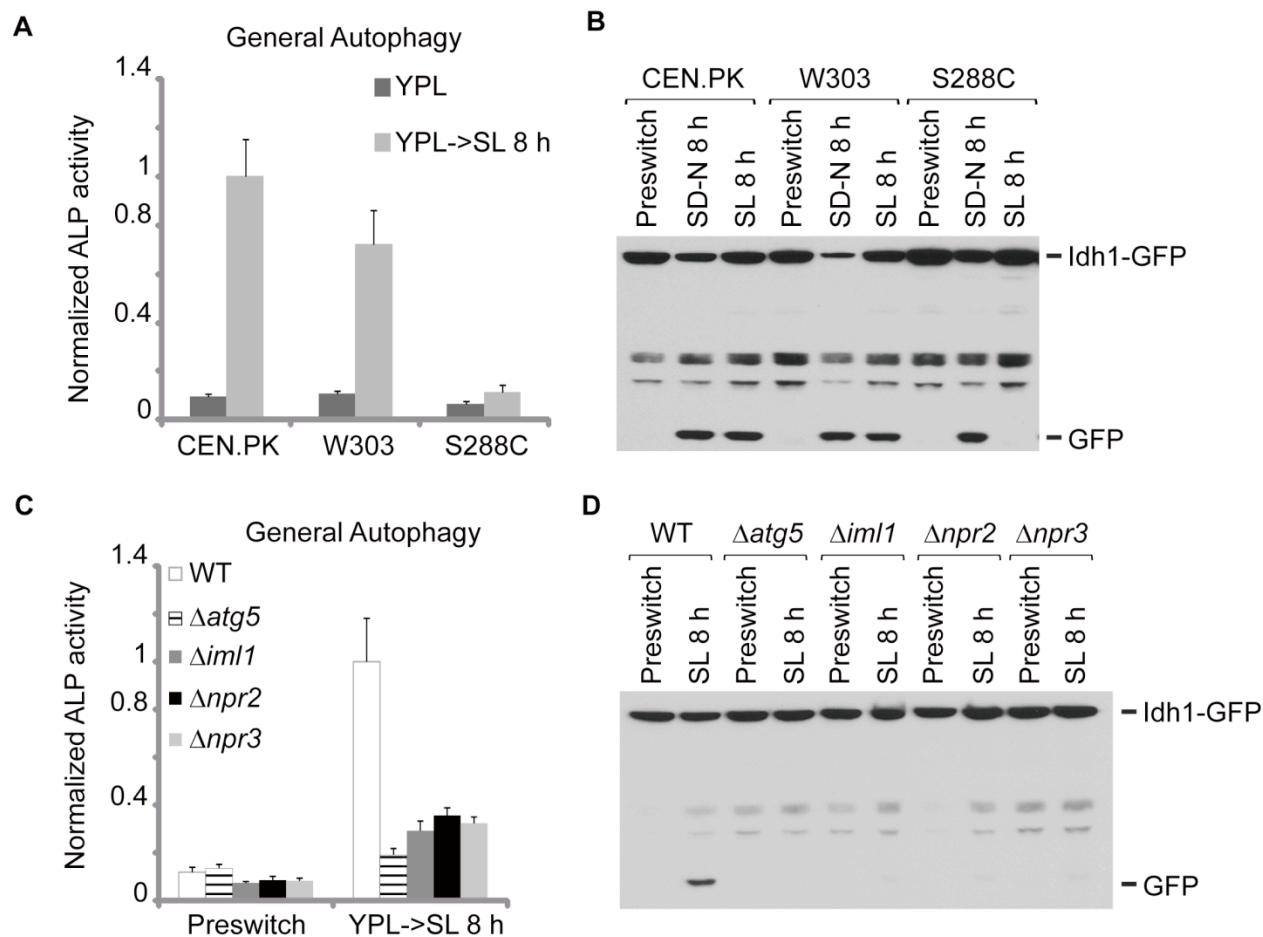

**Figure S3.** *IML1*, *NPR2*, and *NPR3* are Required for NNS-induced Autophagy in the W303 Strain Background.

The prototrophic versions of CEN.PK, W303 and S288C were cultured as described in Figure S1. For the ALP activity assays, data represent the averages of 3-5 samples with error bars for standard deviations.

(A and B) Medium switch from YPL to SL led to robust induction of autophagy in CEN.PK and W303 cells, but not in S288C cells. Another autophagy-inducing condition, nitrogen starvation, served as the positive control.

(C and D) Loss of *IML1*, *NPR2* or *NPR3* in W303 cells strongly inhibited NNS-induced autophagy.  $\Delta atg5$  cells were used as the positive control.

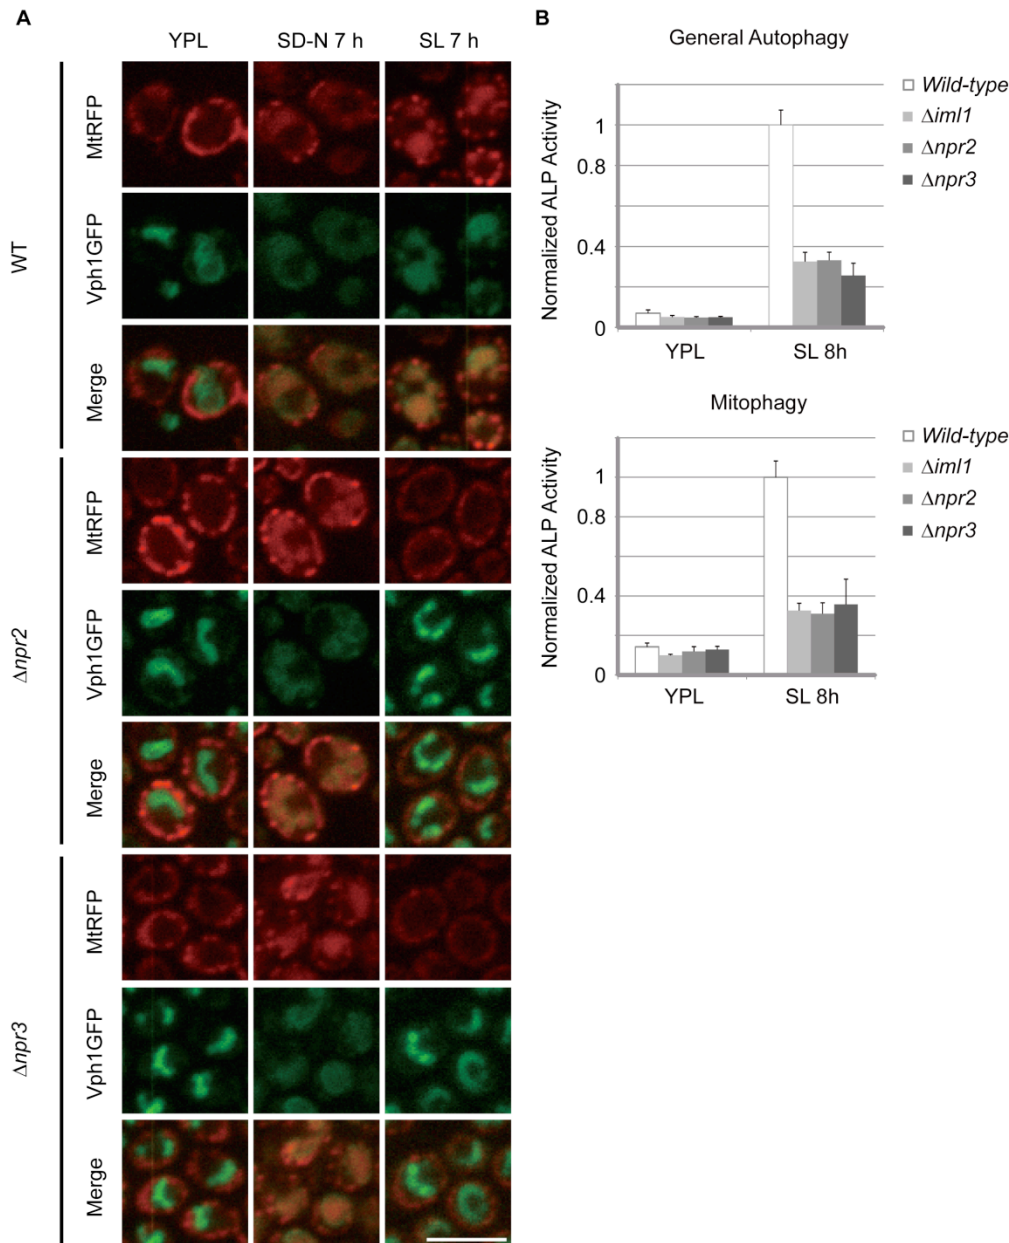

**Figure S4.** *IML1*, *NPR2* and *NPR3* are Selectively Required for NNS-Induced Autophagy

Cells were cultured as described in Figure S1. After 7 or 8 hours following medium switch, general autophagy or mitophagy was measured by ALP activity assay or by imaging using MtRFP as the reporter.

(A) Deletion of *NPR2* and *NPR3* inhibited NNS-induced mitophagy but did not affect nitrogen-starvation-induced mitophagy. Scale bar, 10  $\mu$ m.

(B) Deletion of *IML1*, *NPR2* and *NPR3* led to about 50%-70% decrease in NNS-induced autophagy. Data represent averages of 3-5 samples with error bars for standard deviations.

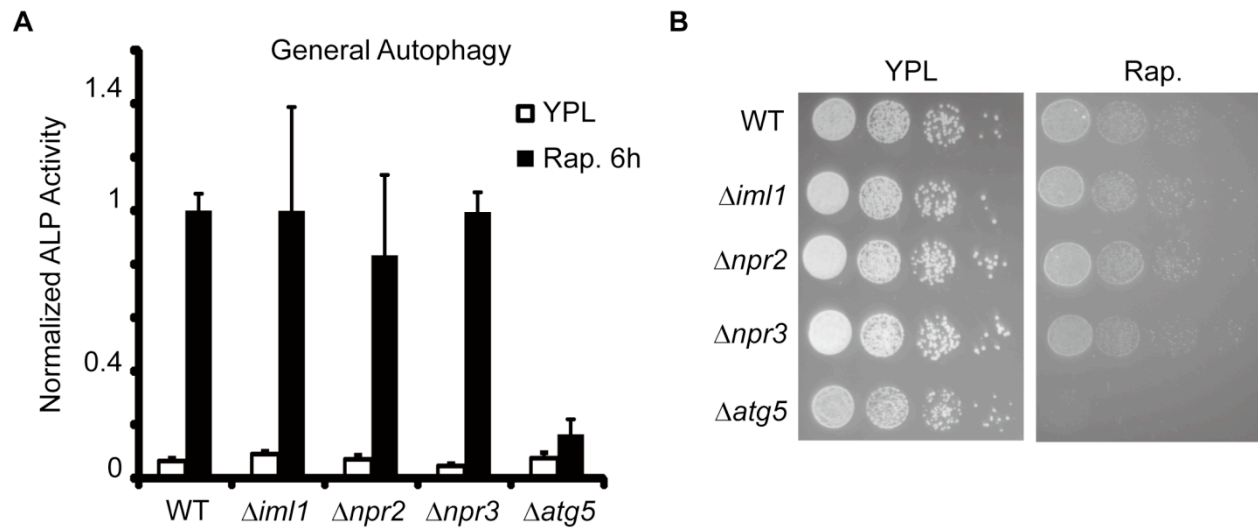

**Figure S5. *IML1*, *NPR2* and *NPR3* are Not Required for Rapamycin-Induced Autophagy.**

(A) Cells were grown in YPL to log phase (OD 0.5-0.8) and then continued to be grown in YPL in the presence or absence of rapamycin (0.2  $\mu\text{g}/\text{mL}$ ) for 6 hours. After rapamycin treatment, general autophagy was measured by ALP activity assay. Data represent the averages of 3-5 samples with error bars for standard deviations. Rap., rapamycin.

(B) Deletion of *IML1*, *NPR2* or *NPR3* did not affect rapamycin sensitivity. Cells of the indicated genotypes were grown in YPL to log phase and then serial 10-fold dilutions of cells were stamped onto YPL plates supplemented with or without rapamycin (0.2  $\mu\text{g}/\text{mL}$ ). Images were captured after cells had been incubated at 30°C for 2-4 days.

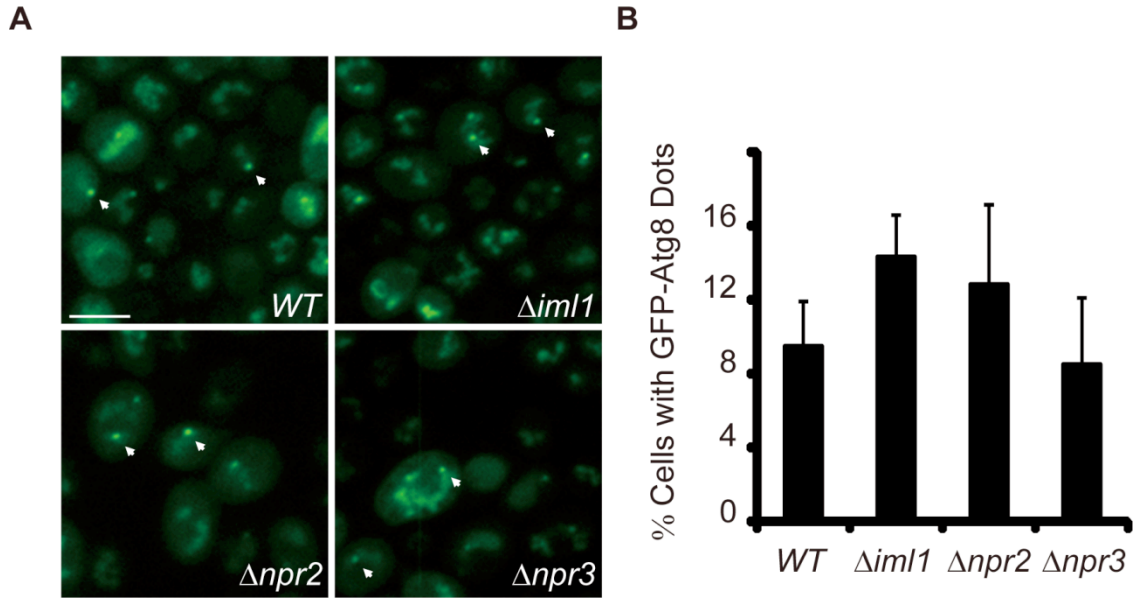

**Figure S6.** Deletion of *IML1*, *NPR2* or *NPR3* Does Not Affect Atg8p Dot Formation upon Switch to SL Medium.

WT or mutant cells that express GFP-Atg8 were grown in YPL to log phase and then switched to SL medium. Thirty minutes after medium switch, cells were collected for GFP imaging.

(A) Representative images showing the formation of Atg8p dots in SL as indicated by the arrows. Scale bar, 5  $\mu$ m.

(B) Quantification of Atg8p dot formation in WT and mutant cells. At least 200 cells were counted for each genotype. Data represent averages from three independent experiments with error bars for standard deviations.



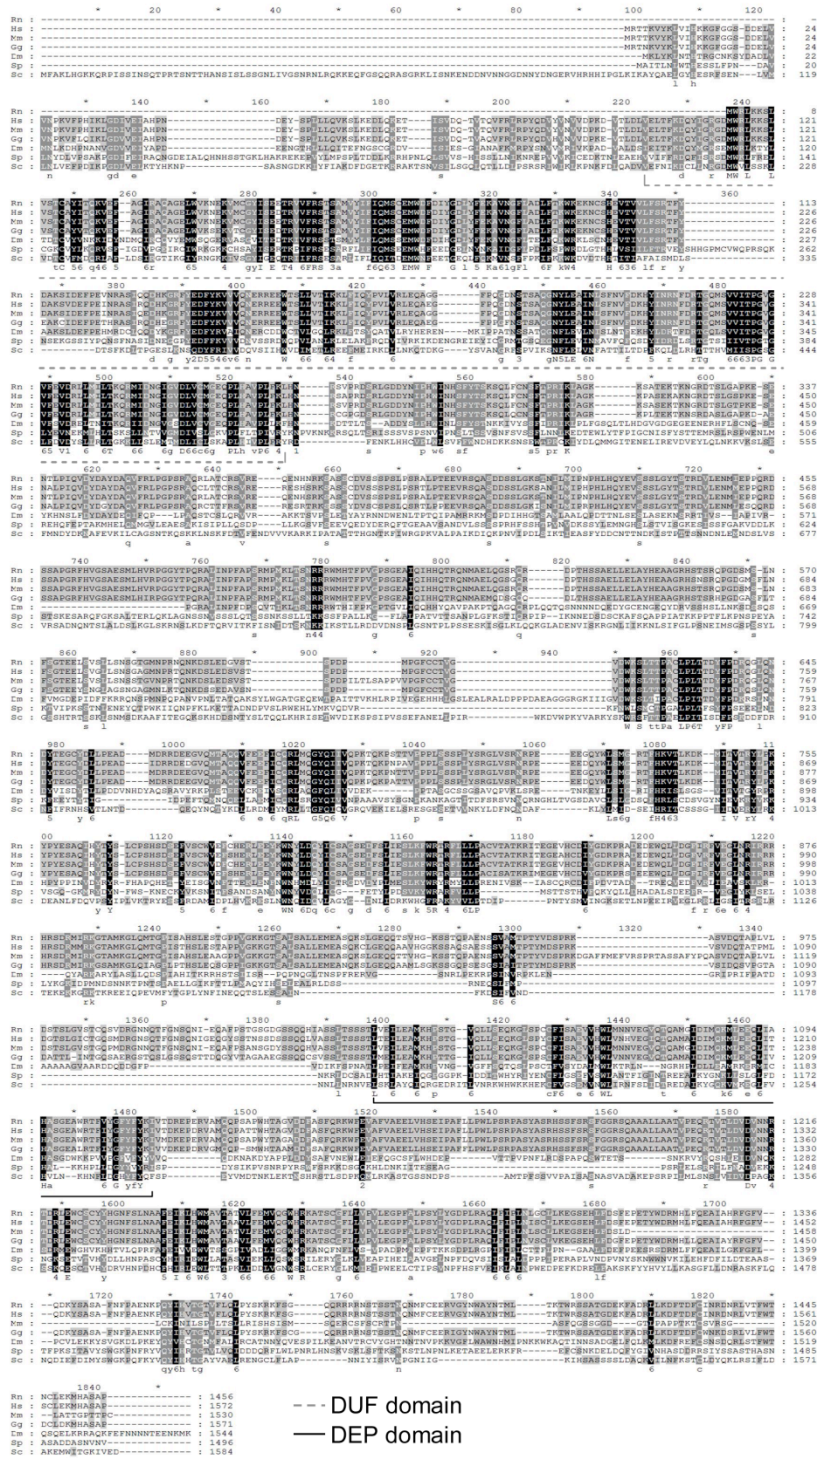

**Figure S7.** Multiple Sequence Alignment of Iml1p and its Orthologs.

Highly conserved residues are colored in black. Partially conserved residues are colored in gray. The DUF and DEP domains are highlighted by straight lines beneath the sequences. Mm, *Mus musculus*; Rn, *Rattus norvegicus*; Hs, *Homo sapiens*; Gg, *Gallus gallus*; Dm, *Drosophila melanogaster*; Sp, *Schizosaccharomyces pombe*; Sc, *Saccharomyces cerevisiae*.

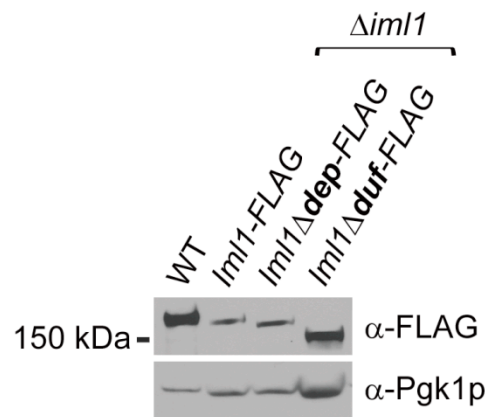

**Figure S8.** Ectopic Expression of Full-Length and the Domain-Deleted Versions of Iml1p.

The coding sequence for full length IML1-FLAG, IML1Δdep-FLAG or IML1Δduf-FLAG was cloned into a centromeric plasmid p417-CYC1. Plasmids expressing Iml1-FLAG, Iml1Δdep-FLAG or Iml1Δduf-FLAG were transformed into  $\Delta iml1$  cells to determine the ectopic expression levels of full-length and the domain-deleted versions of Iml1p. Cells were collected and analyzed as described in Figure 5F. Pgk1p was used as the loading control. WT cells expressing Iml1-FLAG from the endogenous chromosomal locus are shown for comparison.



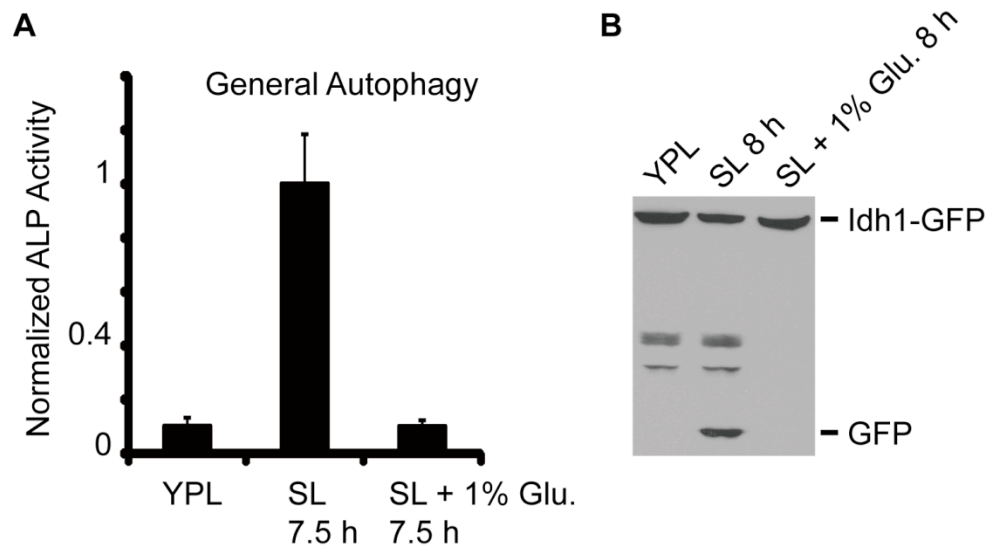

**Figure S9.** NNS-induced Autophagy Is Completely Blocked by Addition of Glucose.

Cells were cultured in YPL to log phase and then switched to SL medium in the presence or absence of 1% glucose for about 8 hours. Glu., glucose.

(A) NNS-induced general autophagy was totally blocked by addition of glucose. Data represent the averages of 3-5 samples with error bars for standard deviations.

(B) NNS-induced mitophagy was totally blocked by addition of glucose.

Table S1 Yeast Strains Used in This Study

| Name  | Genotype                                                                                   | Strain Background   |
|-------|--------------------------------------------------------------------------------------------|---------------------|
| YXW1  | <i>MATa ho::ADH1<sup>P</sup>-Mito-dsRed::kanMX4 vph1::VPH1-GFP::kanMX6</i>                 | prototrophic CEN.PK |
| YXW2  | <i>MATα om45::OM45-GFP::kanMX6 vph1::VPH1-mCherry::natNT2</i>                              | prototrophic CEN.PK |
| YXW3  | <i>MATα om45::OM45-GFP::kanMX6 vph1::VPH1-mCherry::natNT2 atg5::hphNT1</i>                 | prototrophic CEN.PK |
| YXW4  | <i>MATα om45::OM45-GFP::kanMX6 vph1::VPH1-mCherry::natNT2 atg11::hphNT1</i>                | prototrophic CEN.PK |
| YXW5  | <i>MATa pho8::TEF1<sup>P</sup>-OM-pho8Δ60::kanMX6 pho13::natNT2</i>                        | prototrophic CEN.PK |
| YXW6  | <i>MATa pho8::TEF1<sup>P</sup>-OM-pho8Δ60::kanMX6 pho13::natNT2 atg5::hphNT1</i>           | prototrophic CEN.PK |
| YXW7  | <i>MATa pho8::TEF1<sup>P</sup>-OM-pho8Δ60::kanMX6 pho13::hphNT1 atg11::natNT2</i>          | prototrophic CEN.PK |
| YXW8  | <i>MATa pho8::TEF1<sup>P</sup>-OM-pho8Δ60::kanMX6 pho13::natNT2 atg32::hphNT1</i>          | prototrophic CEN.PK |
| YXW9  | <i>MATa pho8::TEF1<sup>P</sup>-OM-pho8Δ60::kanMX6 pho13::natNT2 iml1::hphNT1</i>           | prototrophic CEN.PK |
| YXW10 | <i>MATa pho8::TEF1<sup>P</sup>-OM-pho8Δ60::kanMX6 pho13::natNT2 npr2::hphNT1</i>           | prototrophic CEN.PK |
| YXW11 | <i>MATa pho8::TEF1<sup>P</sup>-OM-pho8Δ60::kanMX6 pho13::natNT2 npr3::hphNT1</i>           | prototrophic CEN.PK |
| YXW12 | <i>MATa pho8::TEF1<sup>P</sup>-OM-pho8Δ60::kanMX6 pho13::hphNT1 iml1::IML1-GFP::natNT2</i> | prototrophic CEN.PK |
| YXW13 | <i>MATa pho8::TEF1<sup>P</sup>-OM-pho8Δ60::kanMX6 pho13::natNT2 npr2::NPR2-HA::hphNT1</i>  | prototrophic CEN.PK |
| YXW14 | <i>MATa pho8::TEF1<sup>P</sup>-OM-pho8Δ60::kanMX6 pho13::natNT2 npr3::NPR3-HA::hphNT1</i>  | prototrophic CEN.PK |
| YXW15 | <i>MATa pho8::TEF1<sup>P</sup>-pho8Δ60::kanMX6 pho13::natNT2</i>                           | prototrophic CEN.PK |
| YXW16 | <i>MATa pho8::TEF1<sup>P</sup>-pho8Δ60::kanMX6 pho13::natNT2 atg5::hphNT1</i>              | prototrophic CEN.PK |
| YXW17 | <i>MATa pho8::TEF1<sup>P</sup>-pho8Δ60::kanMX6 pho13::hphNT1 atg11::natNT2</i>             | prototrophic CEN.PK |
| YXW18 | <i>MATa pho8::TEF1<sup>P</sup>-pho8Δ60::kanMX6 pho13::natNT2 iml1::hphNT1</i>              | prototrophic CEN.PK |
| YXW19 | <i>MATa pho8::TEF1<sup>P</sup>-pho8Δ60::kanMX6 pho13::natNT2 npr2::hphNT1</i>              | prototrophic CEN.PK |
| YXW20 | <i>MATa pho8::TEF1<sup>P</sup>-pho8Δ60::kanMX6 pho13::hphNT1 npr3::natNT2</i>              | prototrophic CEN.PK |
| YXW21 | <i>MATa pho8::TEF1<sup>P</sup>-pho8Δ60::kanMX6 pho13::hphNT1 iml1::IML1-GFP::natNT2</i>    | prototrophic CEN.PK |
| YXW22 | <i>MATa pho8::TEF1<sup>P</sup>-pho8Δ60::kanMX6 pho13::natNT2 npr2::NPR2-HA::hphNT1</i>     | prototrophic CEN.PK |
| YXW23 | <i>MATa pho8::TEF1<sup>P</sup>-pho8Δ60::kanMX6 pho13::natNT2 npr3::NPR3-HA::hphNT1</i>     | prototrophic CEN.PK |
| YXW24 | <i>MATα idh1::IDH1-GFP::kanMX6</i>                                                         | prototrophic CEN.PK |
| YXW25 | <i>MATα iml1::IML1-FLAG::kanMX6 npr3::NPR3-HA::hphNT1</i>                                  | prototrophic CEN.PK |
| YXW26 | <i>MATα iml1::IML1-FLAG::kanMX6 npr3::NPR3-HA::hphNT1 npr2::natNT2</i>                     | prototrophic CEN.PK |
| YXW27 | <i>MATα iml1::IML1-FLAG::natNT2 npr2::NPR2-HA::kanMX6</i>                                  | prototrophic CEN.PK |

Table S1 Yeast Strains Used in This Study (Continued)

| <b>Name</b> | <b>Genotype</b>                                                                                                          | <b>Strain Background</b>        |
|-------------|--------------------------------------------------------------------------------------------------------------------------|---------------------------------|
| YXW28       | <i>MAT<math>\alpha</math></i> <i>iml1::IML1-FLAG::natNT2 npr2::NPR2-HA::kanMX6 npr3::hphNT1</i>                          | prototrophic CEN.PK             |
| YXW29       | <i>MAT<math>\alpha</math></i> <i>npr2::NPR2-FLAG::kanMX6 npr3::HA-NPR3::natNT2</i>                                       | prototrophic CEN.PK             |
| YXW30       | <i>MAT<math>\alpha</math></i> <i>npr2::NPR2-FLAG::kanMX6 npr3::HA-NPR3::natNT2 iml1::hphNT1</i>                          | prototrophic CEN.PK             |
| YXW31       | <i>MAT<math>\alpha</math></i> <i>iml1::IML1-FLAG::kanMX6</i>                                                             | prototrophic CEN.PK             |
| YXW32       | <i>MAT<math>\alpha</math></i> <i>npr2::NPR2-FLAG::kanMX6</i>                                                             | prototrophic CEN.PK             |
| YXW33       | <i>MAT<math>\alpha</math></i> <i>npr3::NPR3-FLAG::kanMX6</i>                                                             | prototrophic CEN.PK             |
| YXW34       | <i>MAT<math>\alpha</math></i> <i>iml1::IML1-GFP::kanMX6</i>                                                              | prototrophic CEN.PK             |
| YXW35       | <i>MAT<math>\alpha</math></i> <i>iml1::IML1-GFP::kanMX6 vph1::VPH1-mCherry::natNT2</i>                                   | prototrophic CEN.PK             |
| YXW36       | <i>MAT<math>\alpha</math></i> <i>iml1::IML1-GFP::kanMX6 ape1::APE1-mRFP1::hphNT1</i>                                     | prototrophic CEN.PK             |
| YXW37       | <i>MAT<math>\alpha</math></i> <i>iml1::IML1-GFP::kanMX6 vph1::VPH1-mCherry::natNT2 npr2::hphNT1</i>                      | prototrophic CEN.PK             |
| YXW38       | <i>MAT<math>\alpha</math></i> <i>iml1::IML1-GFP::kanMX6 vph1::VPH1-mCherry::natNT2 npr3::hphNT1</i>                      | prototrophic CEN.PK             |
| YXW39       | <i>MAT<math>\alpha</math></i> <i>iml1::IML1-GFP::kanMX6 vph1::VPH1-mCherry::natNT2 atg8::hphNT1</i>                      | prototrophic CEN.PK             |
| YXW40       | <i>MAT<math>\alpha</math></i> <i>ho::ADH1<sup>P</sup>-Mito-dsRed::kanMX4 leu2::hphNT1</i>                                | prototrophic CEN.PK             |
| YXW41       | <i>MAT<math>\alpha</math></i> <i>ho::ADH1<sup>P</sup>-Mito-dsRed::kanMX4 leu2::hphNT1 [pRS41N-GFP-ATG8]</i>              | prototrophic CEN.PK             |
| YXW42       | <i>MAT<math>\alpha</math></i> <i>idh1::IDH1-GFP::kanMX6</i>                                                              | prototrophic W303 <sup>1</sup>  |
| YXW43       | <i>MAT<math>\alpha</math></i> <i>idh1::IDH1-GFP::kanMX6 atg5::hphNT1</i>                                                 | prototrophic W303               |
| YXW44       | <i>MAT<math>\alpha</math></i> <i>idh1::IDH1-GFP::kanMX6 iml1::hphNT1</i>                                                 | prototrophic W303               |
| YXW45       | <i>MAT<math>\alpha</math></i> <i>idh1::IDH1-GFP::kanMX6 npr2::hphNT1</i>                                                 | prototrophic W303               |
| YXW46       | <i>MAT<math>\alpha</math></i> <i>idh1::IDH1-GFP::kanMX6 npr3::hphNT1</i>                                                 | prototrophic W303               |
| YXW47       | <i>MAT<math>\alpha</math></i> <i>pho8::TEF1<sup>P</sup>-pho8<math>\Delta</math>60::kanMX6 pho13::natNT2</i>              | prototrophic W303               |
| YXW48       | <i>MAT<math>\alpha</math></i> <i>idh1::IDH1-GFP::kanMX6</i>                                                              | prototrophic S288C <sup>2</sup> |
| YXW49       | <i>MAT<math>\alpha</math></i> <i>pho8::TEF1<sup>P</sup>-pho8<math>\Delta</math>60::kanMX6 pho13::natNT2</i>              | prototrophic S288C              |
| YXW50       | <i>MAT<math>\alpha</math></i> <i>pho8::TEF1<sup>P</sup>-pho8<math>\Delta</math>60::kanMX6 pho13::natNT2 atg5::hphNT1</i> | prototrophic W303               |
| YXW51       | <i>MAT<math>\alpha</math></i> <i>pho8::TEF1<sup>P</sup>-pho8<math>\Delta</math>60::kanMX6 pho13::natNT2 iml1::hphNT1</i> | prototrophic W303               |
| YXW52       | <i>MAT<math>\alpha</math></i> <i>pho8::TEF1<sup>P</sup>-pho8<math>\Delta</math>60::kanMX6 pho13::natNT2 npr2::hphNT1</i> | prototrophic W303               |
| YXW53       | <i>MAT<math>\alpha</math></i> <i>pho8::TEF1<sup>P</sup>-pho8<math>\Delta</math>60::kanMX6 pho13::natNT2 npr3::hphNT1</i> | prototrophic W303               |
| YXW54       | <i>MAT<math>\alpha</math></i> <i>idh1::IDH1-GFP::natNT2 iml1::hphNT1 [p417-CYC1<sup>P</sup>]</i>                         | prototrophic CEN.PK             |

Table S1 Yeast Strains Used in This Study (Continued)

| <b>Name</b> | <b>Genotype</b>                                                                                                                                                           | <b>Strain Background</b> |
|-------------|---------------------------------------------------------------------------------------------------------------------------------------------------------------------------|--------------------------|
| YXW55       | <i>MAT<math>\alpha</math> idh1::IDH1-GFP::natNT2 iml1::hphNT1 [p417-CYC1<sup>P</sup>-IML1-FLAG]</i>                                                                       | prototrophic CEN.PK      |
| YXW56       | <i>MAT<math>\alpha</math> idh1::IDH1-GFP::natNT2 iml1::hphNT1 [p417-CYC1<sup>P</sup>-iml1<math>\Delta</math>dep-FLAG]</i>                                                 | prototrophic CEN.PK      |
| YXW57       | <i>MAT<math>\alpha</math> idh1::IDH1-GFP::natNT2 iml1::hphNT1 [p417-CYC1<sup>P</sup>-iml1<math>\Delta</math>duf-FLAG]</i>                                                 | prototrophic CEN.PK      |
| YXW58       | <i>MAT<math>\alpha</math> pho8::TEF1<sup>P</sup>-pho8<math>\Delta</math>60::hphNT1 pho13::natNT2 iml1::hphNT1 [p417-CYC1<sup>P</sup>]</i>                                 | prototrophic CEN.PK      |
| YXW59       | <i>MAT<math>\alpha</math> pho8::TEF1<sup>P</sup>-pho8<math>\Delta</math>60::hphNT1 pho13::natNT2 iml1::hphNT1 [p417-CYC1<sup>P</sup>-IML1-FLAG]</i>                       | prototrophic CEN.PK      |
| YXW60       | <i>MAT<math>\alpha</math> pho8::TEF1<sup>P</sup>-pho8<math>\Delta</math>60::hphNT1 pho13::natNT2 iml1::hphNT1 [p417-CYC1<sup>P</sup>-iml1<math>\Delta</math>dep-FLAG]</i> | prototrophic CEN.PK      |
| YXW61       | <i>MAT<math>\alpha</math> pho8::TEF1<sup>P</sup>-pho8<math>\Delta</math>60::hphNT1 pho13::natNT2 iml1::hphNT1 [p417-CYC1<sup>P</sup>-iml1<math>\Delta</math>duf-FLAG]</i> | prototrophic CEN.PK      |
| YXW62       | <i>MAT<math>\alpha</math> npr2::NPR2-HA::natNT2 iml1::hphNT1 [p417-CYC1<sup>P</sup>-IML1-FLAG]</i>                                                                        | prototrophic CEN.PK      |
| YXW63       | <i>MAT<math>\alpha</math> npr2::NPR2-HA::natNT2 iml1::hphNT1 [p417-CYC1<sup>P</sup>-iml1<math>\Delta</math>dep-FLAG]</i>                                                  | prototrophic CEN.PK      |
| YXW64       | <i>MAT<math>\alpha</math> npr2::NPR2-HA::natNT2 iml1::hphNT1 [p417-CYC1<sup>P</sup>-iml1<math>\Delta</math>duf-FLAG]</i>                                                  | prototrophic CEN.PK      |
| YXW65       | <i>MAT<math>\alpha</math> npr3::NPR3-HA::natNT2 iml1::hphNT1 [p417-CYC1<sup>P</sup>-IML1-FLAG]</i>                                                                        | prototrophic CEN.PK      |
| YXW66       | <i>MAT<math>\alpha</math> npr3::NPR3-HA::natNT2 iml1::hphNT1 [p417-CYC1<sup>P</sup>-iml1<math>\Delta</math>dep-FLAG]</i>                                                  | prototrophic CEN.PK      |
| YXW67       | <i>MAT<math>\alpha</math> npr3::NPR3-HA::natNT2 iml1::hphNT1 [p417-CYC1<sup>P</sup>-iml1<math>\Delta</math>duf-FLAG]</i>                                                  | prototrophic CEN.PK      |
| YXW68       | <i>MAT<math>\alpha</math> ho::ADH1<sup>P</sup>-Mito-dsRed::kanMX4 vph1::VPH1-GFP::kanMX6 npr3::HA-NPR3::natNT2</i>                                                        | prototrophic CEN.PK      |
| YXW69       | <i>MAT<math>\alpha</math> ho::ADH1<sup>P</sup>-Mito-dsRed::kanMX4 vph1::VPH1-GFP::kanMX6 atg1::hphNT1</i>                                                                 | prototrophic CEN.PK      |
| YXW70       | <i>MAT<math>\alpha</math> ho::ADH1<sup>P</sup>-Mito-dsRed::kanMX4 vph1::VPH1-GFP::kanMX6 atg13::hphNT1</i>                                                                | prototrophic CEN.PK      |
| YXW71       | <i>MAT<math>\alpha</math> ho::ADH1<sup>P</sup>-Mito-dsRed::kanMX4 vph1::VPH1-GFP::kanMX6 atg8::hphNT1</i>                                                                 | prototrophic CEN.PK      |
| YXW72       | <i>MAT<math>\alpha</math> ho::ADH1<sup>P</sup>-Mito-dsRed::kanMX4 vph1::VPH1-GFP::kanMX6 atg9::hphNT1</i>                                                                 | prototrophic CEN.PK      |
| YXW73       | <i>MAT<math>\alpha</math> atg13::HA-ATG13::natNT2</i>                                                                                                                     | prototrophic CEN.PK      |
| YXW74       | <i>MAT<math>\alpha</math> atg13::HA-ATG13::natNT2 iml1::hphNT1</i>                                                                                                        | prototrophic CEN.PK      |
| YXW75       | <i>MAT<math>\alpha</math> atg13::HA-ATG13::natNT2 npr2::hphNT1</i>                                                                                                        | prototrophic CEN.PK      |
| YXW76       | <i>MAT<math>\alpha</math> atg13::HA-ATG13::natNT2 npr3::hphNT1</i>                                                                                                        | prototrophic CEN.PK      |
| YXW77       | <i>MAT<math>\alpha</math> atg1::hphNT1</i>                                                                                                                                | prototrophic CEN.PK      |

Table S1 Yeast Strains Used in This Study (Continued)

| <b>Name</b> | <b>Genotype</b>                                                      | <b>Strain Background</b> |
|-------------|----------------------------------------------------------------------|--------------------------|
| YXW78       | <i>MAT<math>\alpha</math> atg6::hphNT1</i>                           | prototrophic CEN.PK      |
| YXW79       | <i>MAT<math>\alpha</math> atg7::hphNT1</i>                           | prototrophic CEN.PK      |
| YXW80       | <i>MAT<math>\alpha</math> atg8::hphNT1</i>                           | prototrophic CEN.PK      |
| YXW81       | <i>MAT<math>\alpha</math> atg9::hphNT1</i>                           | prototrophic CEN.PK      |
| YXW82       | <i>MAT<math>\alpha</math> atg10::hphNT1</i>                          | prototrophic CEN.PK      |
| YXW83       | <i>MAT<math>\alpha</math> atg13::hphNT1</i>                          | prototrophic CEN.PK      |
| YXW84       | <i>MAT<math>\alpha</math> atg5::kanMX6</i>                           | prototrophic CEN.PK      |
| YXW85       | <i>MAT<math>\alpha</math> iml1::hphNT1</i>                           | prototrophic CEN.PK      |
| YXW86       | <i>MAT<math>\alpha</math> npr2::kanMX6</i>                           | prototrophic CEN.PK      |
| YXW87       | <i>MAT<math>\alpha</math> npr3::kanMX6</i>                           | prototrophic CEN.PK      |
| YXW88       | <i>MAT<math>\alpha</math> pep4::kanMX6 prb1::hphNT1</i>              | prototrophic CEN.PK      |
| YXW89       | <i>MAT<math>\alpha</math> pep4::natNT2 prb1::hphNT1 npr2::kanMX6</i> | prototrophic CEN.PK      |
| YXW90       | <i>MAT<math>\alpha</math> pep4::natNT2 prb1::hphNT1 atg5::kanMX6</i> | prototrophic CEN.PK      |
| YXW91       | <i>MAT<math>\alpha</math> pep4::natNT2 prb1::kanMX6 iml1::hphNT1</i> | prototrophic CEN.PK      |
| YXW92       | <i>MAT<math>\alpha</math> pep4::kanMX6 prb1::hphNT1 npr3::natNT2</i> | prototrophic CEN.PK      |
| YXW93       | <i>MAT<math>\alpha</math> pex14::PEX14-GFP::kanMX6</i>               | prototrophic CEN.PK      |
| YXW94       | <i>MAT<math>\alpha</math> [p417-GFP-ATG8]</i>                        | prototrophic CEN.PK      |
| YXW95       | <i>MAT<math>\alpha</math> iml1::hphNT1 [p417-GFP-ATG8]</i>           | prototrophic CEN.PK      |
| YXW96       | <i>MAT<math>\alpha</math> npr2::kanMX6 [pRS41H-GFP-ATG8]</i>         | prototrophic CEN.PK      |
| YXW97       | <i>MAT<math>\alpha</math> npr3::kanMX6 [pRS41H-GFP-ATG8]</i>         | prototrophic CEN.PK      |
| YXW98       | <i>MAT<math>\alpha</math> atg32::kanMX6</i>                          | prototrophic CEN.PK      |

<sup>1</sup>The prototrophic version of W303 is a kind gift from Andrew Murray.

<sup>2</sup>The prototrophic version of S288C was purchased from ATCC (Catalog No. 204508).
